# Supplementary material for: piRNAs of Caenorhabditis elegans broadly silence nonself sequences through functionally random targeting
Source: PubMed Central journal article supplement — Nucleic Acids Res. 2022 Jan 17;50(3):1416–29. doi: 10.1093/nar/gkab1290 (PMC8860604; doi:10.1093/nar/gkab1290), 2022-01-17
Supplement: gkab1290_supplemental_file.pdf [file gkab1290_supplemental_file.pdf]

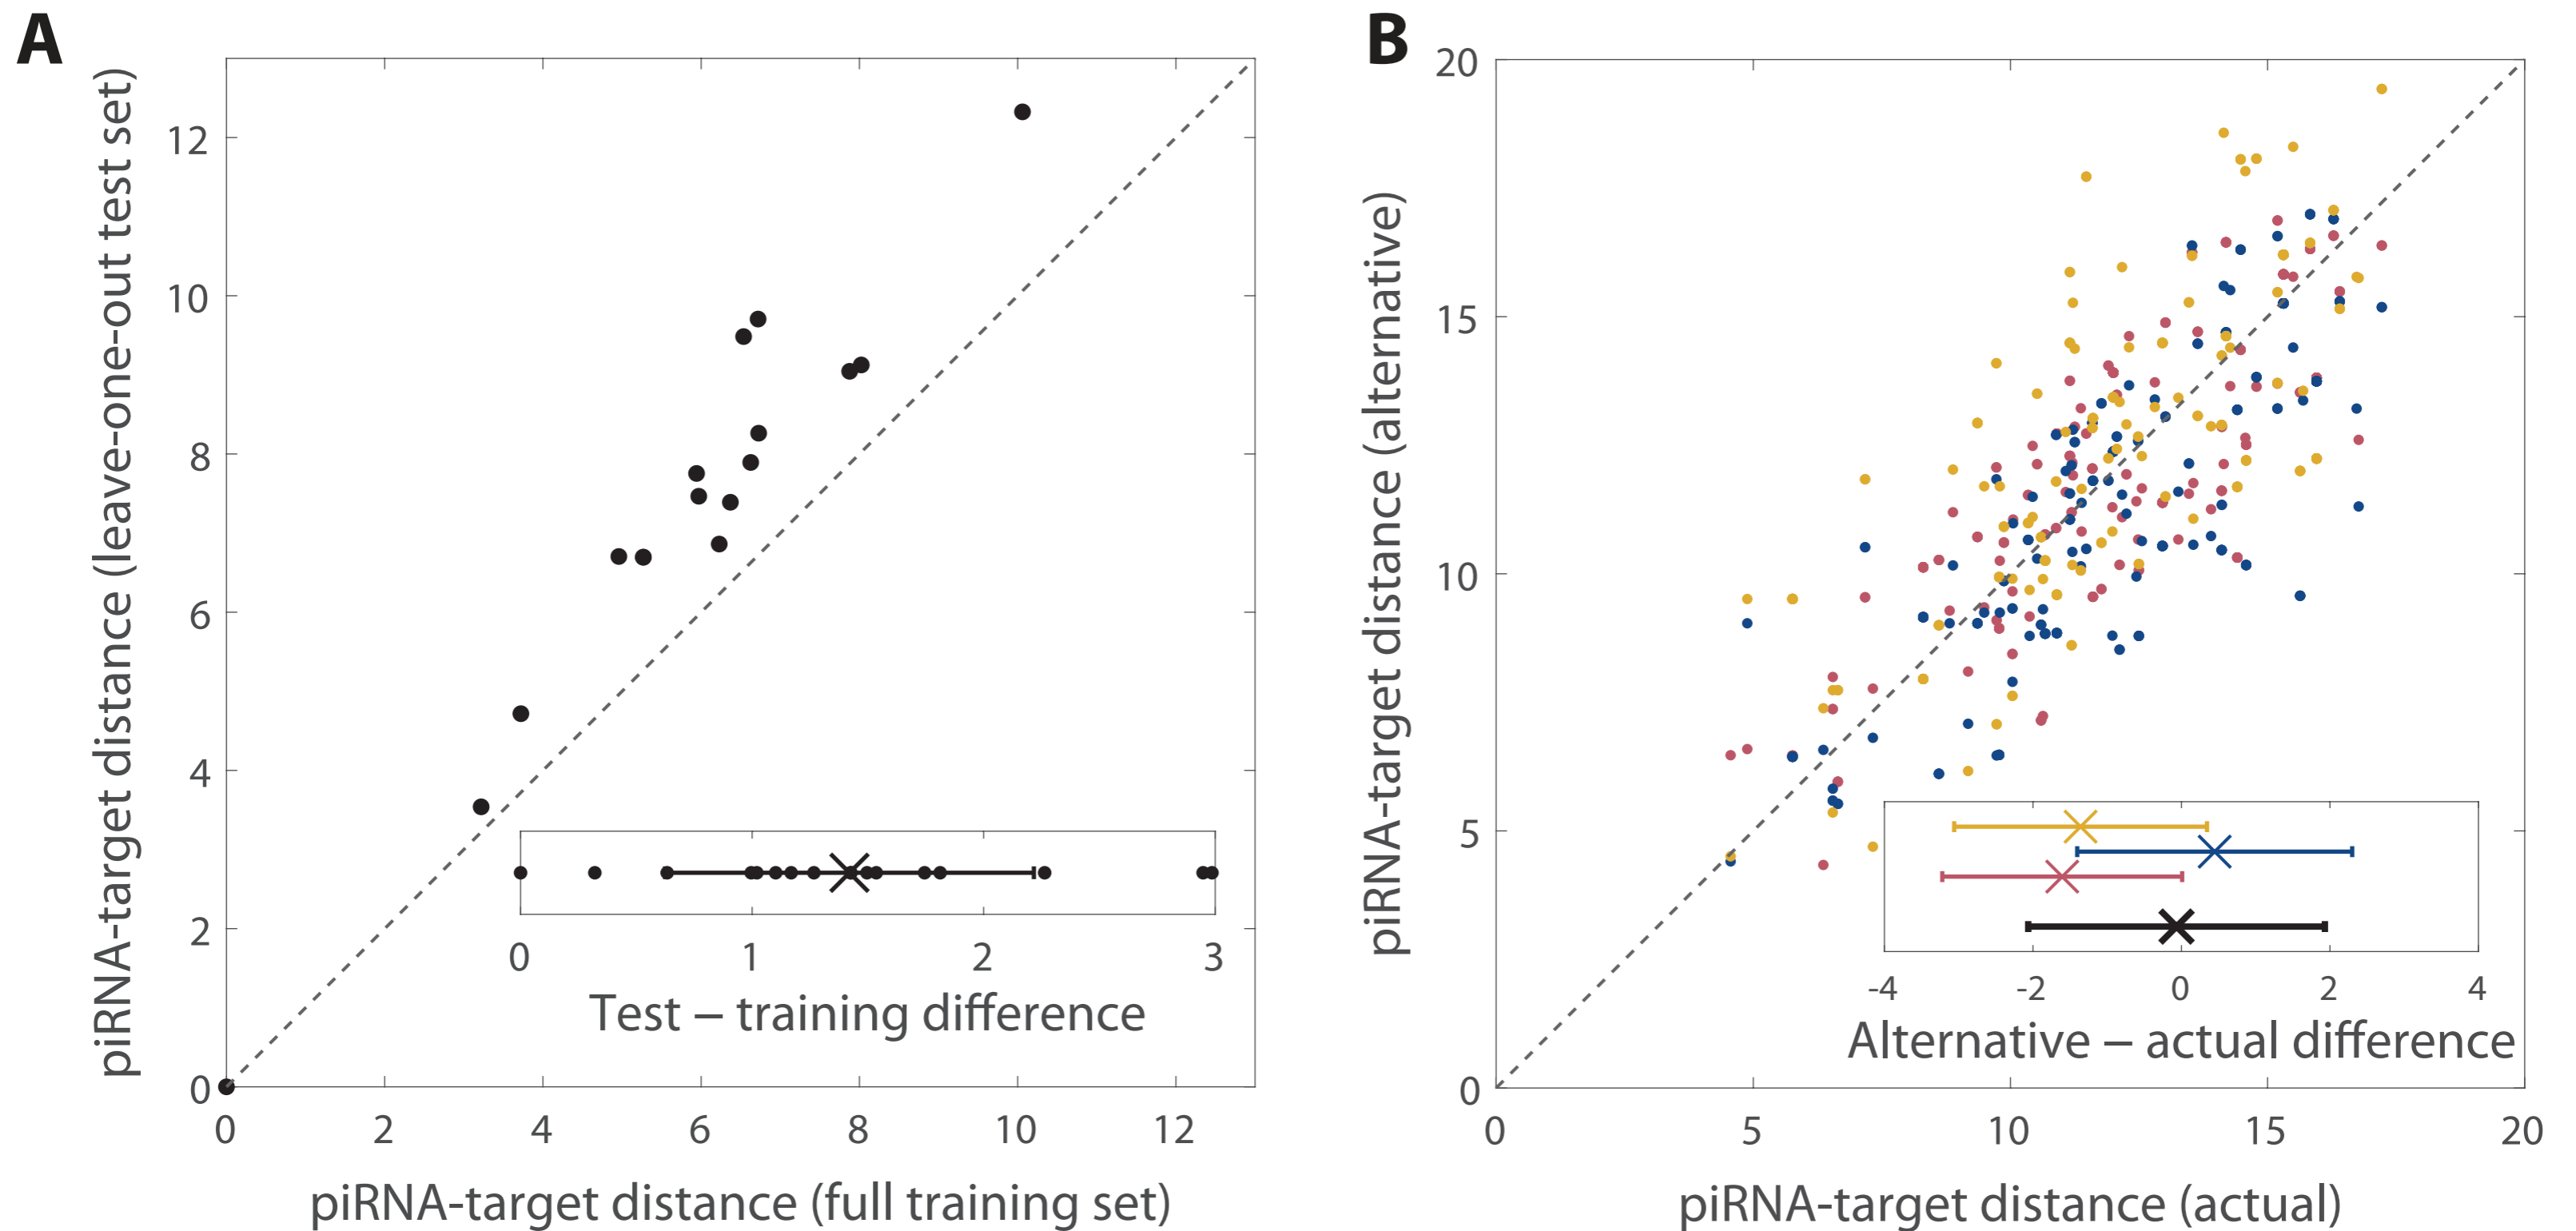

Supplementary Figure 1. Cross-validation of distance metric. **(A)** Leave-one-out cross-validation. Comparison between piRNA-target distances of experimentally validated piRNA-target pairs using the full training set (the piRNA distance utilized in the rest of the paper, incorporating all known pairs) or leave-one-out test sets (where the pair being measured is omitted when calculating the log-odds probabilities). The dashed line indicates perfect equivalence. Inset: the difference between the distance calculated between each piRNA-target pair in the leave-one-out test set and in the full training set, for each of the 17 experimentally confirmed piRNA-target pairs. The cross and error bar indicate mean and standard deviation. **(B)** Cross-validation using putative piRNA-target pairs in piRTarBase, identified by CLASH and differential expression after PRG-1 knockout. Alternative piRNA-target distances were constructed using 17 randomly selected putative piRNA-target pairs, out of a total  $n = 354$ . The distances between the remaining 337 putative piRNA-target pairs were measured using both an alternative distance metric and the actual distance used in the paper, and the results of the two distance metrics were compared. Different colors correspond to three different random choices of 17 putative pairs; the dashed line shows perfect equivalence. Inset: the mean and standard deviation of the difference between the alternative and actual piRNA-target distance. Colored bars show the three random choices of 17 putative pairs used in the scatterplot, while the black bar shows the mean and standard deviation across 100 random choices of sets of 17 putative pairs.

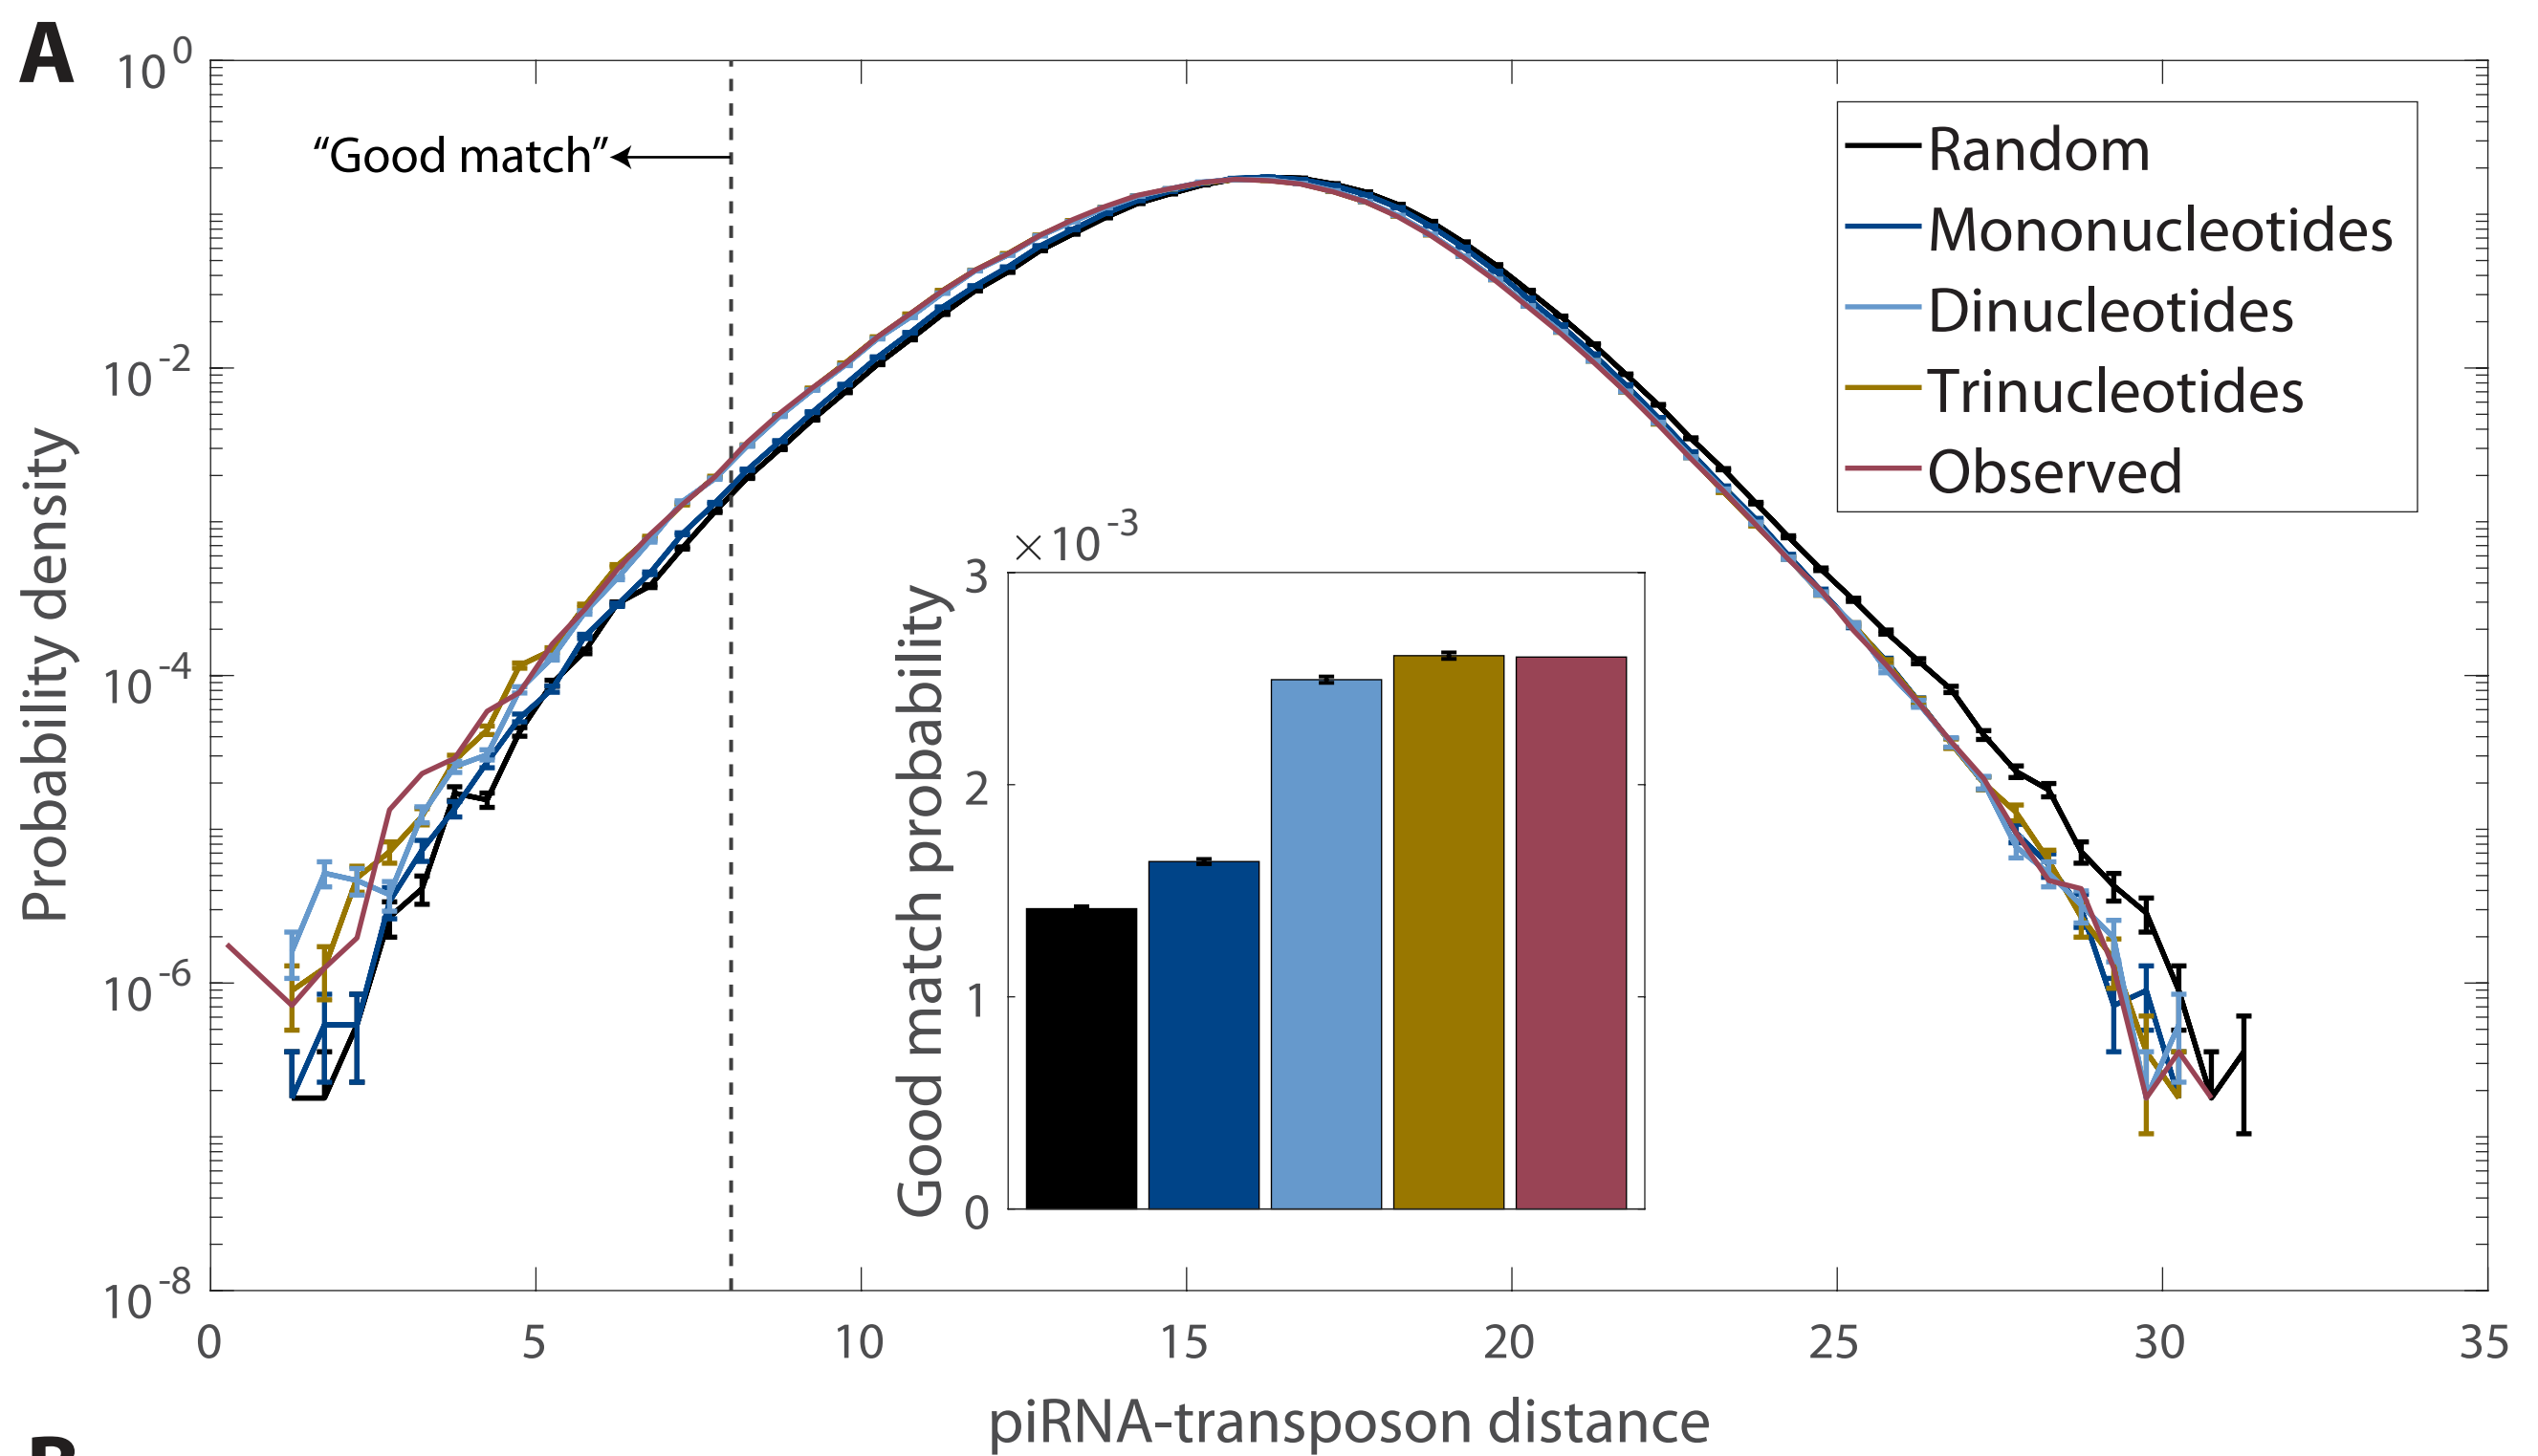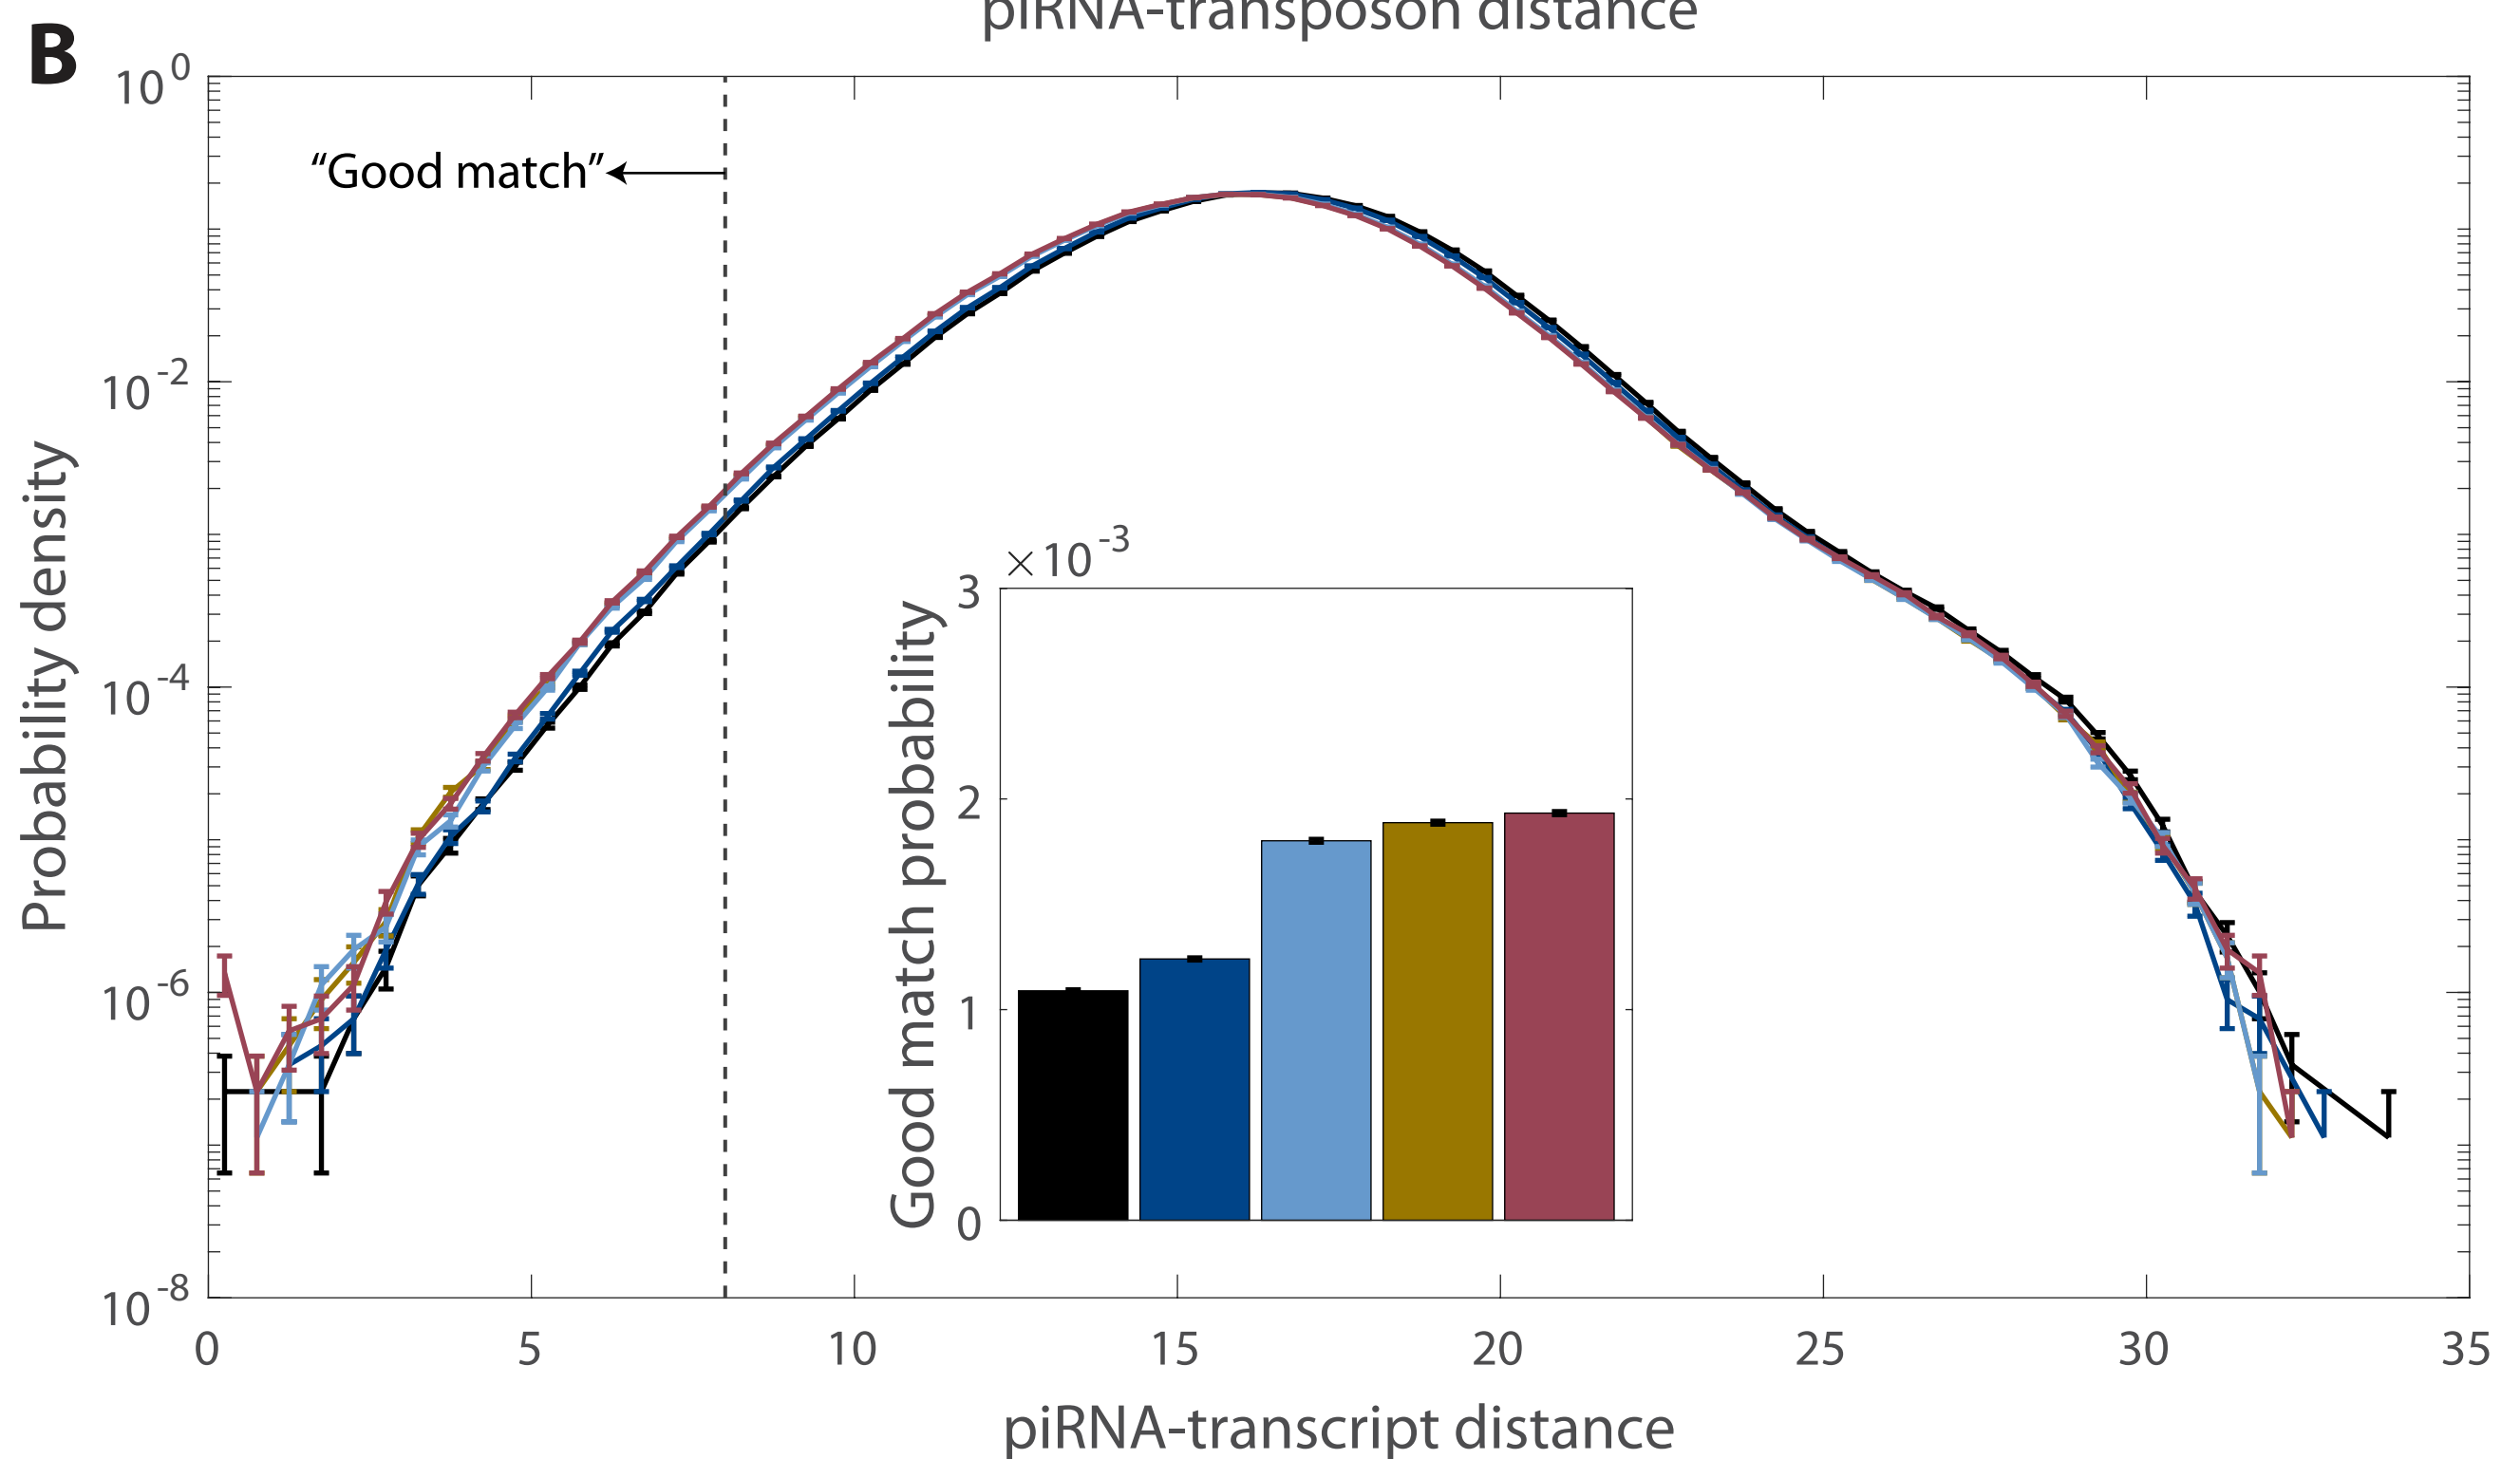

Supplementary Figure 2. Comparison between real and random *C. elegans* piRNA-transposon and piRNA-transcript pairing, with random piRNAs generated preserving mono-, di-, and trinucleotide probabilities across each piRNA. **(A)** Probability distribution of the closest-match piRNA-transposon distance for every pair of *C. elegans* piRNAs ( $n = 17,849$ ) and transposons ( $n = 627$ ), similar to Fig. 4A. In addition to real piRNA sequences (red) and fully random piRNA sequences (black), results are shown for random piRNA sequences which maintain the position-specific mononucleotide (dark blue), dinucleotide (light blue), and trinucleotide (yellow) probabilities of real piRNAs. Inset: proportion of piRNA-transposon pairs where the closest-matching site has a piRNA-target distance of less than 8 (left of the dashed vertical line in the main panel), for each set of piRNAs. Error bars indicate counting error. **(B)** Same as (A), but for a random sample of all *C. elegans* transcripts ( $n = 1,000$ ) rather than transposons.

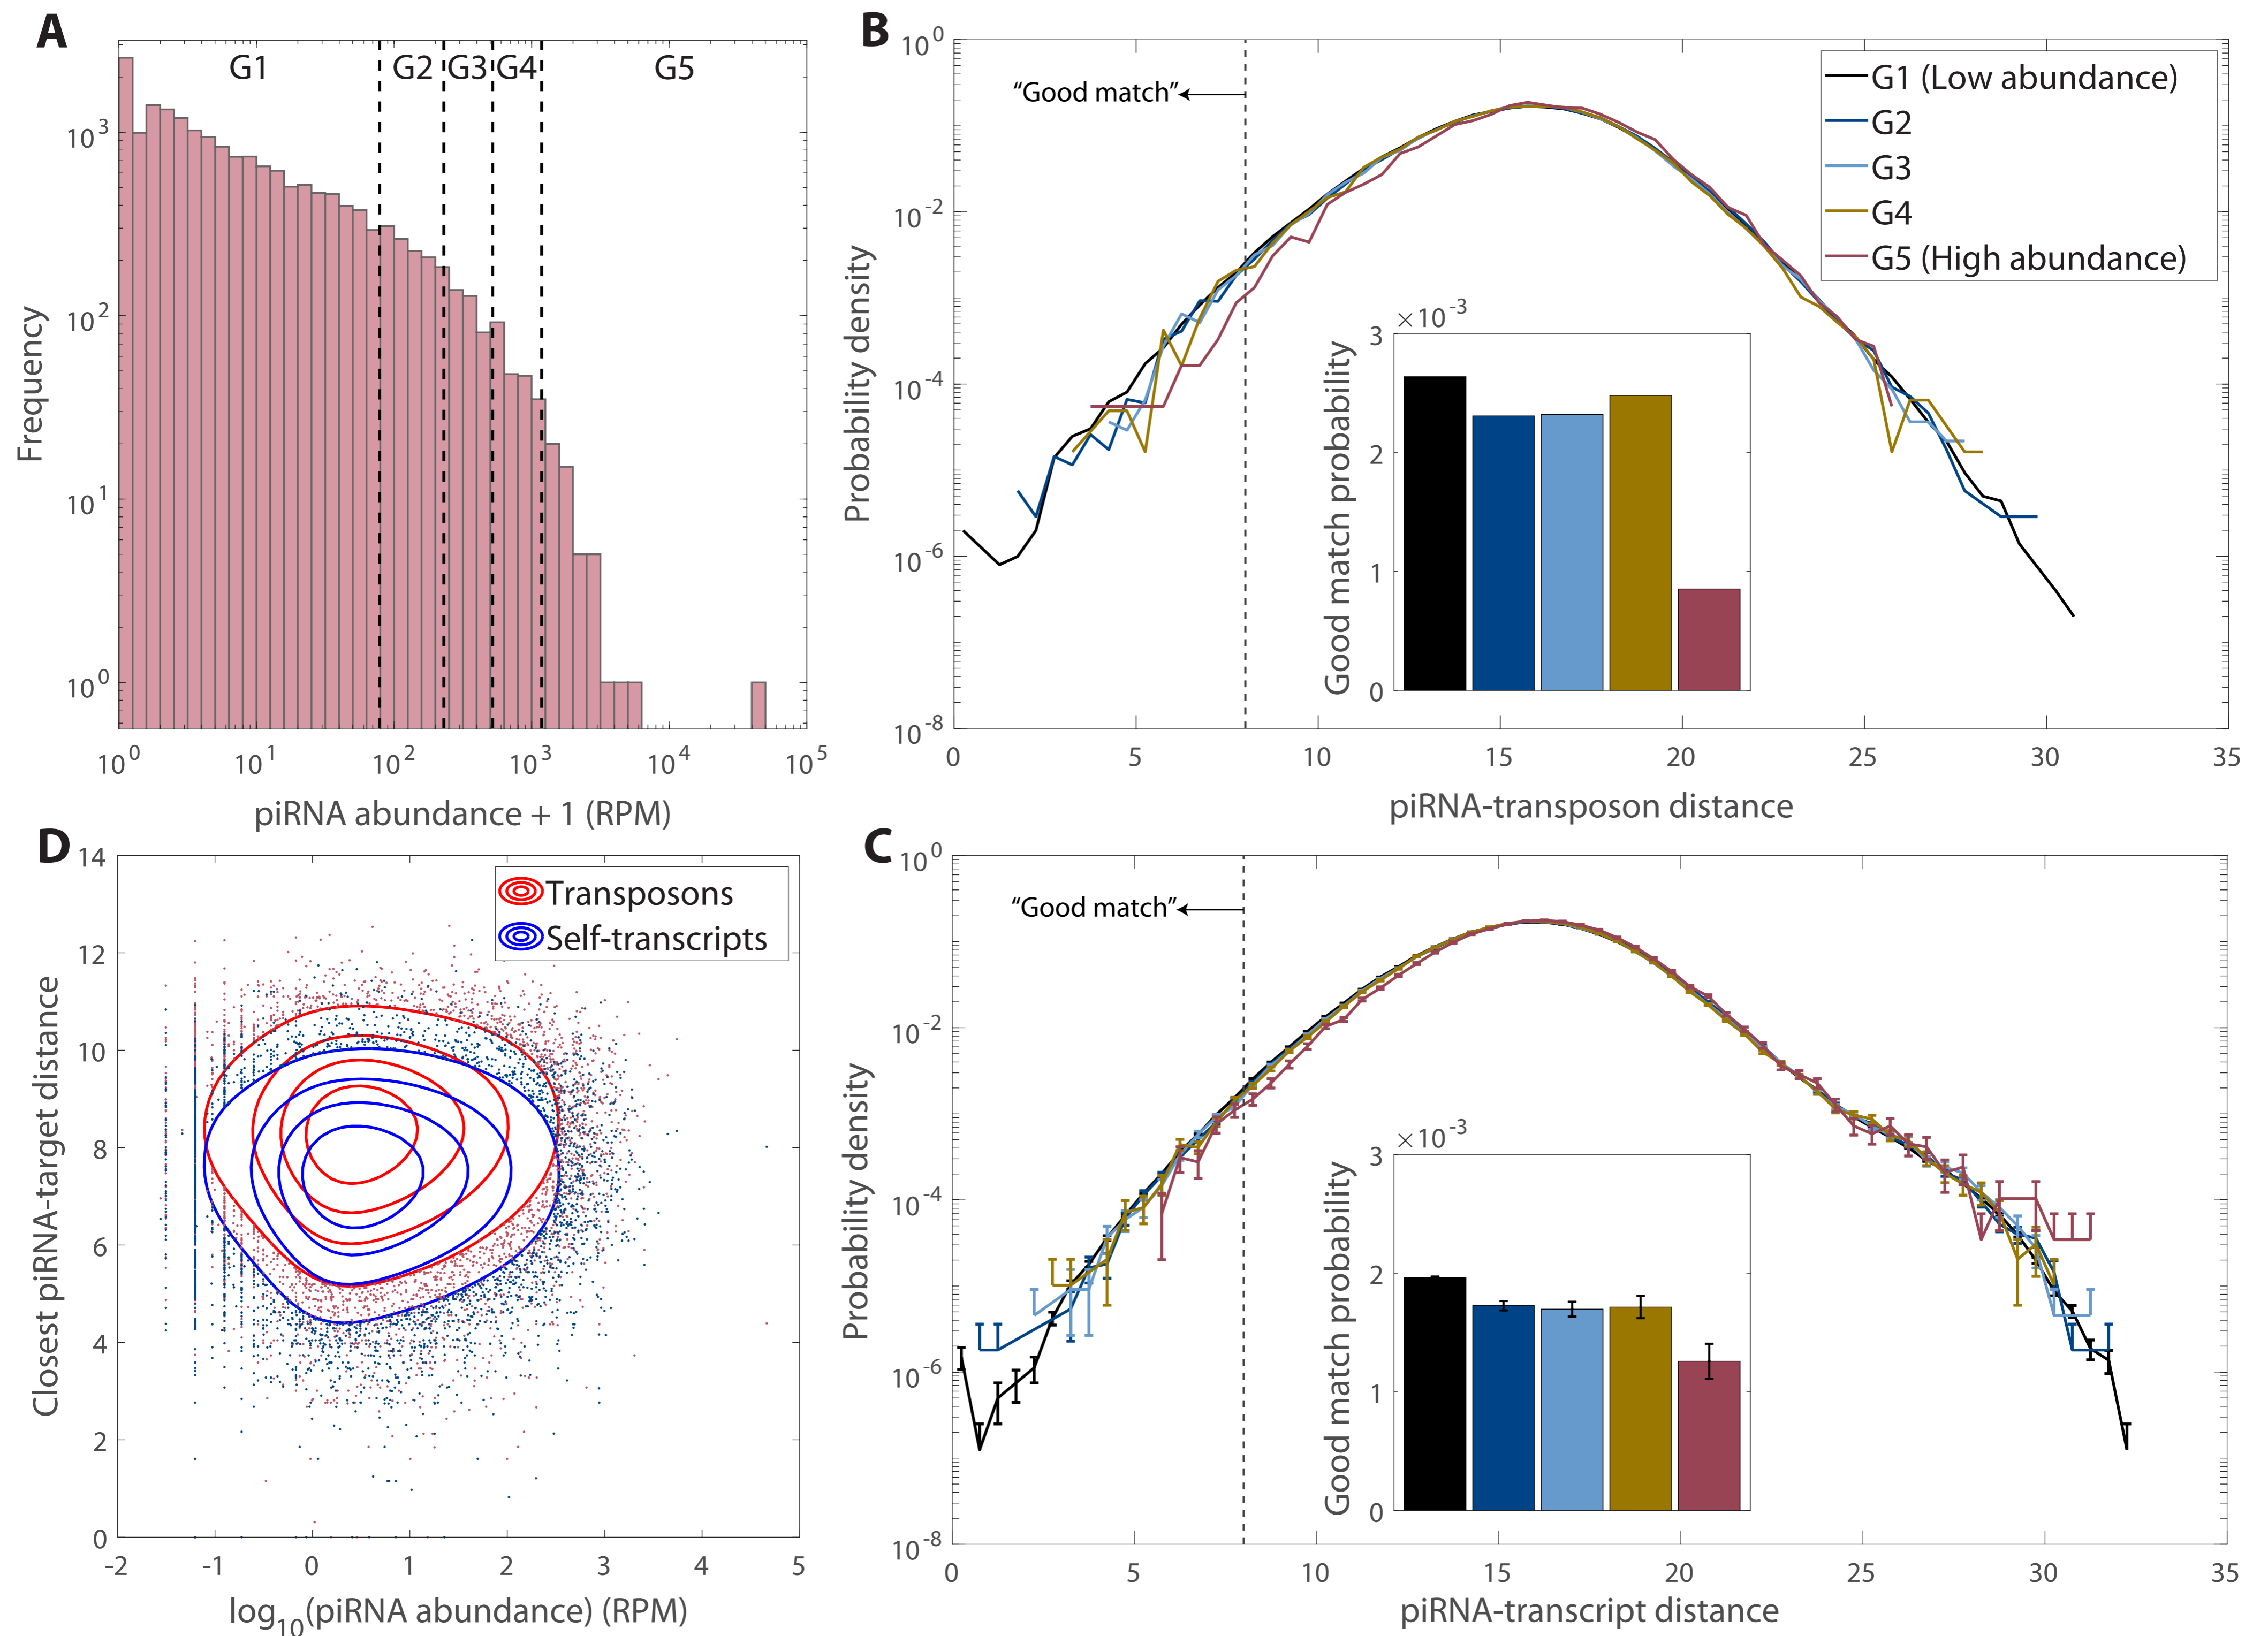

Supplementary Figure 3. Analysis of *C. elegans* piRNA abundance data in the context of piRNA-transposon and piRNA-target pairing. **(A)** Histogram of piRNA abundance (in reads per million) on a log-log scale for the 17,833 piRNAs with abundance data. Dashed lines show the division of piRNAs into five groups sorted by abundance, such that each group contains the same total number of reads per million. **(B)** Probability distribution of the closest-match piRNA-transposon distance for every pair of these *C. elegans* piRNAs ( $n = 17,833$ ) and transposons ( $n = 627$ ), with piRNAs divided into each of the five abundance-ordered groups in (A). Inset: proportion of piRNA-transposon pairs where the closest-matching site has a piRNA-target distance of less than 8 (left of the dashed vertical line in the main panel), for each set of piRNAs. **(C)** Same as (B), but for a random sample of all *C. elegans* transcripts ( $n = 1,000$ ) rather than transposons. Error bars indicate counting error. **(D)** Combined contour- and scatter-plot showing the abundance of each piRNA ( $n = 17,833$ ), along with the piRNA-target distance between it and its closest match on a transposon (red) or self-transcript (blue). Each contour curve is a region with equal density of observations in the scatterplot, with higher density in the inner contours and lower density in the outer contours. Outside the outermost contour, individual observations are plotted.

**Supplementary Table 1: References to RepBase Reports transposon consensus sequences**

| <b>Organism</b> | <b>Author</b>                 | <b>Name</b>   | <b>Year</b> | <b>Volume</b> | <b>Issue</b> | <b>Page</b> |
|-----------------|-------------------------------|---------------|-------------|---------------|--------------|-------------|
| C. brenneri     | Kojima,K.K. and Jurka,J.      | NeSL-1_CBre   | 2013        | 13            | 1            | 760         |
| C. brenneri     | Kojima,K.K. and Jurka,J.      | NeSL-2_CBre   | 2013        | 13            | 1            | 764         |
| C. brenneri     | Kojima,K.K. and Jurka,J.      | NeSL-3_CBre   | 2013        | 13            | 1            | 766         |
| C. brenneri     | Kojima,K.K. and Jurka,J.      | TE-1_CBre     | 2013        | 13            | 1            | 769         |
| C. brenneri     | Kojima,K.K. and Jurka,J.      | CR1-1_CBre    | 2018        | 18            | 3            | 354         |
| C. brenneri     | Kojima,K.K. and Jurka,J.      | RTE-1_CBre    | 2018        | 18            | 3            | 357         |
| C. brenneri     | Kojima,K.K. and Jurka,J.      | CR1-2_CBre    | 2018        | 18            | 3            | 366         |
| C. brenneri     | Kojima,K.K. and Jurka,J.      | CR1-3_CBre    | 2018        | 18            | 3            | 368         |
| C. brenneri     | Kojima,K.K. and Jurka,J.      | CR1-4_CBre    | 2018        | 18            | 3            | 370         |
| C. brenneri     | Kojima,K.K. and Jurka,J.      | CR1-5_CBre    | 2018        | 18            | 3            | 372         |
| C. brenneri     | Kojima,K.K. and Jurka,J.      | CR1-6_CBre    | 2018        | 18            | 3            | 374         |
| C. brenneri     | Kojima,K.K. and Jurka,J.      | CR1-7_CBre    | 2018        | 18            | 3            | 376         |
| C. brenneri     | Kojima,K.K. and Jurka,J.      | CR1-8_CBre    | 2018        | 18            | 3            | 378         |
| C. brenneri     | Kojima,K.K. and Jurka,J.      | RTE-2_CBre    | 2018        | 18            | 3            | 383         |
| C. brenneri     | Kojima,K.K. and Jurka,J.      | RTE-3_CBre    | 2018        | 18            | 3            | 384         |
| C. briggsae     | Feschotte,C. and Wessler,S.R. | Merlin1_CB    | 2003        | 3             | 5            | 92          |
| C. briggsae     | Pavlicek,A. and Jurka,J.      | MERLIN5_CB    | 2004        | 4             | 6            | 185         |
| C. briggsae     | Kapitonov,V.V. and Jurka,J.   | Mirage1_CB    | 2004        | 4             | 6            | 186         |
| C. briggsae     | Kapitonov,V.V. and Jurka,J.   | MirageN1a_CB  | 2004        | 4             | 6            | 187         |
| C. briggsae     | Kapitonov,V.V. and Jurka,J.   | MirageN1b_CB  | 2004        | 4             | 6            | 188         |
| C. briggsae     | Pavlicek,A. and Jurka,J.      | HAT10_CB      | 2004        | 4             | 8            | 204         |
| C. briggsae     | Pavlicek,A. and Jurka,J.      | HAT6_CB       | 2004        | 4             | 8            | 205         |
| C. briggsae     | Pavlicek,A. and Jurka,J.      | HAT7_CB       | 2004        | 4             | 8            | 206         |
| C. briggsae     | Pavlicek,A. and Jurka,J.      | HAT8_CB       | 2004        | 4             | 8            | 207         |
| C. briggsae     | Pavlicek,A. and Jurka,J.      | MARINER38A_CB | 2004        | 4             | 8            | 208         |
| C. briggsae     | Pavlicek,A. and Jurka,J.      | MARINER38B_CB | 2004        | 4             | 8            | 209         |
| C. briggsae     | Pavlicek,A. and Jurka,J.      | MARINER38C_CB | 2004        | 4             | 8            | 210         |
| C. briggsae     | Pavlicek,A. and Jurka,J.      | MARINER40_CB  | 2004        | 4             | 8            | 211         |
| C. briggsae     | Pavlicek,A. and Jurka,J.      | MARINER41_CB  | 2004        | 4             | 8            | 212         |
| C. briggsae     | Pavlicek,A. and Jurka,J.      | MARINER42_CB  | 2004        | 4             | 8            | 213         |
| C. briggsae     | Pavlicek,A. and Jurka,J.      | MUDR4_CB      | 2004        | 4             | 8            | 214         |
| C. briggsae     | Pavlicek,A. and Jurka,J.      | MUDR5A_CB     | 2004        | 4             | 8            | 215         |
| C. briggsae     | Pavlicek,A. and Jurka,J.      | GYPSY1-I_CB   | 2004        | 4             | 9            | 225         |
| C. briggsae     | Pavlicek,A. and Jurka,J.      | GYPSY1-LTR_CB | 2004        | 4             | 9            | 226         |
| C. briggsae     | Pavlicek,A. and Jurka,J.      | GYPSY2-I_CB   | 2004        | 4             | 9            | 227         |
| C. briggsae     | Pavlicek,A. and Jurka,J.      | GYPSY2-LTR_CB | 2004        | 4             | 9            | 228         |
| C. briggsae     | Pavlicek,A. and Jurka,J.      | GYPSY3-I_CB   | 2004        | 4             | 9            | 229         |
| C. briggsae     | Pavlicek,A. and Jurka,J.      | GYPSY3-LTR_CB | 2004        | 4             | 9            | 230         |
| C. briggsae     | Pavlicek,A. and Jurka,J.      | GYPSY4-I_CB   | 2004        | 4             | 9            | 231         |
| C. briggsae     | Pavlicek,A. and Jurka,J.      | GYPSY4-LTR_CB | 2004        | 4             | 9            | 232         |
| C. briggsae     | Pavlicek,A. and Jurka,J.      | GYPSY5-I_CB   | 2004        | 4             | 9            | 233         |
| C. briggsae     | Pavlicek,A. and Jurka,J.      | GYPSY5-LTR_CB | 2004        | 4             | 9            | 234         |
| C. briggsae     | Pavlicek,A. and Jurka,J.      | GYPSY6-I_CB   | 2004        | 4             | 9            | 235         |
| C. briggsae     | Pavlicek,A. and Jurka,J.      | GYPSY6-LTR_CB | 2004        | 4             | 9            | 236         |
| C. briggsae     | Pavlicek,A. and Jurka,J.      | MARINER43_CB  | 2004        | 4             | 9            | 238         |
| C. briggsae     | Pavlicek,A. and Jurka,J.      | MARINER44B_CB | 2004        | 4             | 9            | 239         |

|              |                             |                 |      |    |    |     |
|--------------|-----------------------------|-----------------|------|----|----|-----|
| C. briggsae  | Pavlicek,A. and Jurka,J.    | MARINER44_CB    | 2004 | 4  | 9  | 240 |
| C. briggsae  | Pavlicek,A. and Jurka,J.    | MERLIN6_CB      | 2004 | 4  | 9  | 241 |
| C. briggsae  | Pavlicek,A. and Jurka,J.    | HELITRON10_CB   | 2004 | 4  | 10 | 263 |
| C. briggsae  | Pavlicek,A. and Jurka,J.    | HELITRON11_CB   | 2004 | 4  | 10 | 264 |
| C. briggsae  | Pavlicek,A. and Jurka,J.    | HELITRON12_CB   | 2004 | 4  | 10 | 265 |
| C. briggsae  | Pavlicek,A. and Jurka,J.    | HELITRON13_CB   | 2004 | 4  | 10 | 266 |
| C. briggsae  | Pavlicek,A. and Jurka,J.    | HELITRON14_CB   | 2004 | 4  | 10 | 267 |
| C. briggsae  | Pavlicek,A. and Jurka,J.    | HELITRON1_CB    | 2004 | 4  | 10 | 268 |
| C. briggsae  | Pavlicek,A. and Jurka,J.    | HELITRON2_CB    | 2004 | 4  | 10 | 269 |
| C. briggsae  | Pavlicek,A. and Jurka,J.    | HELITRON3_CB    | 2004 | 4  | 10 | 270 |
| C. briggsae  | Pavlicek,A. and Jurka,J.    | HELITRON4_CB    | 2004 | 4  | 10 | 271 |
| C. briggsae  | Pavlicek,A. and Jurka,J.    | HELITRON5_CB    | 2004 | 4  | 10 | 272 |
| C. briggsae  | Pavlicek,A. and Jurka,J.    | HELITRON6_CB    | 2004 | 4  | 10 | 273 |
| C. briggsae  | Pavlicek,A. and Jurka,J.    | HELITRON7_CB    | 2004 | 4  | 10 | 274 |
| C. briggsae  | Pavlicek,A. and Jurka,J.    | HELITRON8_CB    | 2004 | 4  | 10 | 275 |
| C. briggsae  | Pavlicek,A. and Jurka,J.    | HELITRON9A_CB   | 2004 | 4  | 10 | 276 |
| C. briggsae  | Pavlicek,A. and Jurka,J.    | HELITRON9B_CB   | 2004 | 4  | 10 | 277 |
| C. briggsae  | Pavlicek,A. and Jurka,J.    | HELITRON9C_CB   | 2004 | 4  | 10 | 278 |
| C. briggsae  | Pavlicek,A. and Jurka,J.    | HELITRON9D_CB   | 2004 | 4  | 10 | 279 |
| C. briggsae  | Pavlicek,A. and Jurka,J.    | DIRS-1_CB       | 2005 | 5  | 4  | 82  |
| C. briggsae  | Pavlicek,A. and Jurka,J.    | MuDR-10_CB      | 2005 | 5  | 4  | 85  |
| C. briggsae  | Pavlicek,A. and Jurka,J.    | MuDR-12A_CB     | 2005 | 5  | 4  | 86  |
| C. briggsae  | Pavlicek,A. and Jurka,J.    | MuDR-13_CB      | 2005 | 5  | 4  | 87  |
| C. briggsae  | Pavlicek,A. and Jurka,J.    | MuDR-14_CB      | 2005 | 5  | 4  | 88  |
| C. briggsae  | Pavlicek,A. and Jurka,J.    | MuDR-15_CB      | 2005 | 5  | 4  | 89  |
| C. briggsae  | Pavlicek,A. and Jurka,J.    | MuDR-8_CB       | 2005 | 5  | 4  | 90  |
| C. briggsae  | Pavlicek,A. and Jurka,J.    | MUDR-9_CB       | 2005 | 5  | 4  | 91  |
| C. briggsae  | Kapitonov,V.V. and Jurka,J. | Mariner-N1_CB   | 2005 | 5  | 5  | 123 |
| C. briggsae  | Pavlicek,A. and Jurka,J.    | HAT14_CB        | 2005 | 5  | 7  | 177 |
| C. briggsae  | Pavlicek,A. and Jurka,J.    | HAT15_CB        | 2005 | 5  | 7  | 178 |
| C. briggsae  | Pavlicek,A. and Jurka,J.    | HAT16_CB        | 2005 | 5  | 7  | 179 |
| C. briggsae  | Pavlicek,A. and Jurka,J.    | HAT17_CB        | 2005 | 5  | 7  | 180 |
| C. briggsae  | Pavlicek,A. and Jurka,J.    | DNA2-3_CB       | 2006 | 6  | 3  | 115 |
| C. briggsae  | Pavlicek,A. and Jurka,J.    | DNA8-1_CB       | 2006 | 6  | 3  | 116 |
| C. briggsae  | Pavlicek,A. and Jurka,J.    | DNA8-2_CB       | 2006 | 6  | 3  | 117 |
| C. briggsae  | Pavlicek,A. and Jurka,J.    | DNA8-3_CB       | 2006 | 6  | 3  | 118 |
| C. briggsae  | Kojima,K.K. and Jurka,J.    | NeSL-1_CBri     | 2013 | 13 | 1  | 761 |
| P. pacificus | Jurka,J.                    | DNA-1_PPac      | 2010 | 10 | 7  | 952 |
| P. pacificus | Jurka,J.                    | DNA-2B_PPac     | 2010 | 10 | 7  | 953 |
| P. pacificus | Jurka,J.                    | DNA-2_PPac      | 2010 | 10 | 7  | 954 |
| P. pacificus | Jurka,J.                    | DNA-3_PPac      | 2010 | 10 | 7  | 955 |
| P. pacificus | Jurka,J.                    | DNA-4_PPac      | 2010 | 10 | 7  | 956 |
| P. pacificus | Jurka,J.                    | DNA-5_PPac      | 2010 | 10 | 7  | 957 |
| P. pacificus | Jurka,J.                    | Mariner-1_PPc   | 2010 | 10 | 7  | 958 |
| P. pacificus | Jurka,J.                    | Mariner-2_PPc   | 2010 | 10 | 7  | 959 |
| P. pacificus | Jurka,J. and Kohany,O.      | Gypsy-1_PPc-LTR | 2010 | 10 | 7  | 995 |
| P. pacificus | Jurka,J. and Kohany,O.      | Gypsy-2_PPc-I   | 2010 | 10 | 7  | 996 |

|              |                          |                 |      |    |   |      |
|--------------|--------------------------|-----------------|------|----|---|------|
| P. pacificus | Jurka,J. and Kohany,O.   | Gypsy-2_PPc-LTR | 2010 | 10 | 7 | 997  |
| P. pacificus | Jurka,J. and Kohany,O.   | Gypsy-3_PPc-I   | 2010 | 10 | 7 | 998  |
| P. pacificus | Jurka,J. and Kohany,O.   | Gypsy-3_PPc-LTR | 2010 | 10 | 7 | 999  |
| P. pacificus | Jurka,J. and Kohany,O.   | Gypsy-4_PPc-I   | 2010 | 10 | 7 | 1000 |
| P. pacificus | Jurka,J. and Kohany,O.   | Gypsy-4_PPc-LTR | 2010 | 10 | 7 | 1001 |
| P. pacificus | Jurka,J. and Kohany,O.   | Gypsy-5_PPc-I   | 2010 | 10 | 7 | 1002 |
| P. pacificus | Jurka,J. and Kohany,O.   | Gypsy-5_PPc-LTR | 2010 | 10 | 7 | 1003 |
| P. pacificus | Jurka,J. and Kohany,O.   | Gypsy-6_PPc-I   | 2010 | 10 | 7 | 1004 |
| P. pacificus | Jurka,J. and Kohany,O.   | Gypsy-6_PPc-LTR | 2010 | 10 | 7 | 1005 |
| P. pacificus | Jurka,J. and Kohany,O.   | Gypsy-7_PPc-I   | 2010 | 10 | 7 | 1006 |
| P. pacificus | Jurka,J. and Kohany,O.   | Gypsy-7_PPc-LTR | 2010 | 10 | 7 | 1007 |
| P. pacificus | Jurka,J. and Kohany,O.   | Gypsy-8_PPc-I   | 2010 | 10 | 7 | 1008 |
| P. pacificus | Jurka,J. and Kohany,O.   | Gypsy-8_PPc-LTR | 2010 | 10 | 7 | 1009 |
| P. pacificus | Jurka,J. and Kohany,O.   | Gypsy-9_PPc-I   | 2010 | 10 | 7 | 1010 |
| P. pacificus | Jurka,J. and Kohany,O.   | Gypsy-9_PPc-LTR | 2010 | 10 | 7 | 1011 |
| P. pacificus | Kojima,K.K. and Jurka,J. | RTE-1_PPac      | 2010 | 10 | 7 | 1060 |
| P. pacificus | Kojima,K.K. and Jurka,J. | RTE-2_PPac      | 2010 | 10 | 7 | 1061 |
| P. pacificus | Jurka,J.                 | RTE-3_PPac      | 2010 | 10 | 7 | 1062 |
| P. pacificus | Jurka,J.                 | RTE-4_PPac      | 2010 | 10 | 7 | 1063 |
| P. pacificus | Jurka,J.                 | RTE-5_PPac      | 2010 | 10 | 7 | 1064 |
| P. pacificus | Jurka,J.                 | RTE-6_PPac      | 2010 | 10 | 7 | 1065 |
| P. pacificus | Jurka,J.                 | RTE-7_PPac      | 2010 | 10 | 7 | 1066 |
| P. pacificus | Jurka,J.                 | RTE-10_PPac     | 2018 | 18 | 3 | 358  |
| P. pacificus | Jurka,J.                 | RTE-11_PPac     | 2018 | 18 | 3 | 359  |
| P. pacificus | Jurka,J.                 | RTE-12_PPac     | 2018 | 18 | 3 | 360  |
| P. pacificus | Jurka,J.                 | RTE-13_PPac     | 2018 | 18 | 3 | 361  |
| P. pacificus | Jurka,J.                 | RTE-14_PPac     | 2018 | 18 | 3 | 362  |
| P. pacificus | Jurka,J.                 | CR1-2_PPac      | 2018 | 18 | 3 | 363  |
| P. pacificus | Jurka,J.                 | CR1-1_PPac      | 2018 | 18 | 3 | 365  |
| P. pacificus | Jurka,J.                 | RTE-8_PPac      | 2018 | 18 | 3 | 385  |
| P. pacificus | Jurka,J.                 | RTE-9_PPac      | 2018 | 18 | 3 | 386  |
| P. pacificus | Jurka,J.                 | CR1-3_PPac      | 2018 | 18 | 3 | 387  |
| P. pacificus | Jurka,J.                 | CR1-4_PPac      | 2018 | 18 | 3 | 388  |
| P. pacificus | Jurka,J.                 | CR1-5_PPac      | 2018 | 18 | 3 | 389  |
| P. pacificus | Jurka,J.                 | CR1-6_PPac      | 2018 | 18 | 3 | 390  |
| P. pacificus | Jurka,J.                 | CR1-7_PPac      | 2018 | 18 | 3 | 391  |
| P. pacificus | Jurka,J.                 | CR1-8_PPac      | 2018 | 18 | 3 | 392  |
| P. pacificus | Jurka,J.                 | CR1-2B_PPac     | 2018 | 18 | 3 | 393  |
